# Supplementary material for: Formin-mediated nuclear actin assembly at androgen receptors promotes transcriptional droplet formation
Source: Research Square preprint supplement (doi:10.21203/rs.3.rs-1664650/v1), 2023-01-31
Supplement: Supplementary file 1 [file 05d634fd15c1b61ca22b9166.xlsx]

## Sheet: Extended Data Fig. 1
blot1
GSF-22/1	GSF-26/1	GSF-104/1	GSF-122/1	GSF-128/1	GSF-163/1
4486225	4984200	1429075	2937725	2796475	1714480	DAAM2 (Adj. Total Band Vol.)
26892918	26047008	25479558	26989982	31074724	28207571	ponceau (Adj. Total Lane Vol.)
0.166818	0.191354	0.0560871	0.108845	0.0899919	0.0607808	ratio DAAM2/ponceau
2457270	1302561	559872	2608956	2810457	2634853	AR (Adj. Total Band Vol.)
26892918	26047008	25479558	26989982	31074724	28207571	ponceau (Adj. Total Lane Vol.)
0.0913724	0.0500081	0.0219734	0.0966639	0.0904419	0.0934094	ratio DAAM2/ponceau
blot2
GSF-22/2	GSF-22/3	GSF-26/2	GSF-26/3	GSF-104/2	GSF-104/3	GSF-122/2	GSF-122/3	GSF-128/2	GSF-128/3	GSF-163/2	GSF-163/3
1412328	1363152	2504232	1262760	573984	545616	1448048	1076920	1454949	663338	853830	697491	DAAM2 (Adj. Total Band Vol.)
20506810	18510878	18902775	18844818	18665004	20975613	20223332	22156008	16945621	16693560	22060260	17815525	ponceau (Adj. Total Lane Vol.)
0.0688712	0.0736406	0.13248	0.0670083	0.0307519	0.0260119	0.0716028	0.0486062	0.0858599	0.0397362	0.0387044	0.0391507	ratio DAAM2/ponceau
1763084	2476544	1709400	1668492	1656172	710640	2860676	2236770	4265494	2169099	3012930	2029328	AR (Adj. Total Band Vol.)
20506810	18510878	18902775	18844818	18665004	20975613	20223332	22156008	16945621	16693560	22060260	17815525	ponceau (Adj. Total Lane Vol.)
0.0859755	0.133789	0.0904312	0.0885385	0.0887314	0.0338793	0.141454	0.100955	0.251717	0.129936	0.136577	0.113908	ratio AR/ponceau

## Sheet: Fig. 1a
GSF-22 EtOH	GSF-22 DHT	GSF-104 EtOH	GSF-104 DHT	GSF-122 EtOH	GSF-122 DHT	GSF-163 EtOH	GSF-163 DHT
23.525	22.715	23.955	24.12	20.7	20.88	23.355	22.39	CP SDHA
26.735	23.68	29.005	28.75	21.96	20.22	25.79	24.55	CP APOD
3.21	0.965	5.05	4.63	1.26	-0.66	2.435	2.16	CP APOD-CP SDHA
4.74037		1.33793		3.78423		1.20999		R= 2 ^– (CP DHT-CP EtOH)
23.635	25.39	24.975	25.59	20.835	20.78	24.34	24.16	CP SDHA
26.875	25.945	29.76	30.015	22.2	20.14	26.745	25.98	CP APOD
3.24	0.555	4.785	4.425	1.365	-0.64	2.405	1.82	CP APOD-CP SDHA
6.43081		1.28343		4.01389		1.50004		R= 2 ^– (CP DHT-CP EtOH)
24.015	26.65	25.58	25.53	23.945	24.79	26.46	23.215	CP SDHA
25.395	25.895	30.235	30.205	24.015	22.89	28.885	25.695	CP APOD
2.635	0.5	4.655	4.675	0.07	-1.9	2.425	2.48	CP APOD-CP SDHA
4.39237		0.986233		3.91768		0.962594		R= 2 ^– (CP DHT-CP EtOH)

## Sheet: Fig. 1b
GSF-22 neg ctrl siRNA EtOH	GSF-22 DAAM2 siRNA EtOH	GSF-22 neg ctrl siRNA DHT	GSF-22 DAAM2 siRNA DHT
20.95	22.03	21.19	21.175	CP SDHA
24.59	25.66	23.095	23.77	CP APOD
3.64	3.63	1.905	2.595	CP APOD-CP SDHA
0.0802141	0.0807721	0.267016	0.165511	R= 2 ^– (CP)
20.96	21.085	21.625	21.225	CP SDHA
24.195	24.865	23.115	23.535	CP APOD
3.235	3.78	1.49	2.31	CP APOD-CP SDHA
0.106211	0.0727958	0.356013	0.20166	R= 2 ^– (CP)
20.895	21.025	21.065	21.155	CP SDHA
24.825	25.21	22.98	23.68	CP APOD
3.93	4.185	1.915	2.525	CP APOD-CP SDHA
0.0656073	0.0549781	0.265172	0.17374	R= 2 ^– (CP)

## Sheet: Extended Data Fig 1b
GSF-22 neg ctrl siRNA EtOH	GSF-22 DAAM2 siRNA EtOH	GSF-22 neg ctrl siRNA DHT	GSF-22 DAAM2 siRNA DHT
20.95	22.03	21.2	21.19	CP SDHA
23.88	28.14	24.165	27.535	CP APOD
2.93	6.11	2.965	6.345	CP APOD-CP SDHA
0.131215	0.0144779	0.12807	0.0123017	R= 2 ^– (CP)
20.96	21.085	21.625	21.225	CP SDHA
23.87	27.67	24.495	27.805	CP APOD
2.91	6.585	2.87	6.58	CP APOD-CP SDHA
0.133046	0.0104164	0.136787	0.0104526	R= 2 ^– (CP)
20.895	21.025	21.065	21.155	CP SDHA
23.815	27.51	24.06	27.73	CP APOD
2.92	6.485	2.995	6.575	CP APOD-CP SDHA
0.132127	0.011164	0.125434	0.0104888	R= 2 ^– (CP)
