# Supplementary material for: Formin-mediated nuclear actin assembly at androgen receptors promotes transcriptional droplet formation
Source: Research Square preprint supplement (doi:10.21203/rs.3.rs-1664650/v1), 2023-01-31
Supplement: Supplementary file 2 [file 0eea1b4161afd02e9f1b8164.xlsx]

## Sheet: D165E  EtOH
1	2	3	4	5	6	7	8	9	10	11	12	13	14	15	cell count
235	507	273	337	210	260	273	384	308	326	207	336	555	412	525	DAAM2 droplets
27	44	34	51	8	10	44	21	46	15	96	20	29	42	46	CoLo events
11.4894	8.6785	12.4542	15.1335	3.80952	3.84615	16.1172	5.46875	14.9351	4.60123	46.3768	5.95238	5.22523	10.1942	8.7619	%
323	378	164	283	96	67	127	240	114	456	118	218	107	358	318	AR droplets
27	44	34	51	8	10	44	21	46	15	96	20	29	42	46	CoLo events
8.35913	11.6402	20.7317	18.0212	8.33333	14.9254	34.6457	8.75	40.3509	3.28947	81.3559	9.17431	27.1028	11.7318	14.4654	%
0.0241125	0.0225127	0.023497	0.0229125	0.0219995	0.0243845	0.0244172	0.0225986	0.0215778	0.0223754	0.0218565	0.0236226	0.0224646	0.0221741	0.0232928	average volume DAAM2 droplets > 0.0185

## Sheet: N614fs EtOH
1	2	3	4	5	6	7	8	9	10	11	12	13	14	15	cell count
361	251	508	231	335	363	389	319	240	345	368	412	462	346	423	DAAM2 count
64	34	141	23	24	47	94	54	34	73	90	28	8	54	62	CoLo events
17.7285	13.5458	27.7559	9.95671	7.16418	12.9477	24.1645	16.9279	14.1667	21.1594	24.4565	6.79612	1.7316	15.6069	14.6572	%
360	140	534	102	259	334	282	229	138	214	250	353	186	229	360	AR count
64	34	141	23	24	47	94	54	34	73	90	28	8	54	62	CoLo events
17.7778	24.2857	26.4045	22.549	9.26641	14.0719	33.3333	23.5808	24.6377	34.1121	36	7.93201	4.30108	23.5808	17.2222	%
0.0266928	0.030837	0.0262323	0.0301541	0.0226772	0.0237669	0.024934	0.028075	0.030796	0.0264619	0.0275698	0.0272132	0.0273159	0.0258945	0.0255316	average volume DAAM2 droplets > 0.0185

## Sheet: D165E DHT
1	2	3	4	5	6	7	8	9	10	11	12	13	14	15	cell count
384	389	414	574	351	424	500	506	367	564	508	448	318	283	402	DAAM2 count
51	61	55	58	53	34	47	70	17	76	39	48	46	66	32	CoLo events
13.2812	15.6812	13.285	10.1045	15.0997	8.01887	9.4	13.834	4.63215	13.4752	7.67717	10.7143	14.4654	23.3216	7.9602	%
668	620	445	556	835	669	585	592	693	283	577	705	662	586	658	AR count
51	61	55	58	53	34	47	70	17	76	39	48	46	66	32	CoLo events
7.63473	9.83871	12.3596	10.4317	6.34731	5.08221	8.03419	11.8243	2.4531	26.8551	6.7591	6.80851	6.94864	11.2628	4.86322	%
0.0324645	0.0303472	0.0325343	0.0244668	0.0374144	0.0234725	0.0270651	0.0218042	0.0279892	0.0223882	0.0240769	0.0251157	0.0275435	0.0284509	0.0232254	average volume DAAM2 droplets > 0.0185

## Sheet: N614fs DHT
1	2	3	4	5	6	7	8	9	10	11	12	13	14	15	cell count
488	353	338	306	559	438	356	464	333	368	350	438	289	333	550	DAAM2 count
33	23	33	46	51	60	69	39	63	30	15	56	42	39	66	CoLo events
6.7623	6.51558	9.76331	15.0327	9.12343	13.6986	19.382	8.40517	18.9189	8.15217	4.28571	12.7854	14.5329	11.7117	12	%
391	400	522	453	431	403	534	531	332	226	247	328	262	320	268	AR count
33	23	33	46	51	60	69	39	63	30	15	56	42	39	66	CoLo events
8.4399	5.75	6.32184	10.1545	11.8329	14.8883	12.9213	7.34463	18.9759	13.2743	6.07287	17.0732	16.0305	12.1875	24.6269	%
0.0275351	0.0251868	0.030345	0.0273853	0.0254493	0.029262	0.0298293	0.0326632	0.0253503	0.0269844	0.0290172	0.0280609	0.0361043	0.0308646	0.0317597	average volume DAAM2 droplets > 0.0185

## Sheet: GSF control EtOH
1	2	3	4	5	6	7	8	9	10	11	12	13	14	15	cell count
336	163	455	450	261	438	280	410	352	346	501	728	296	424	247	DAAM2 count
2	21	67	53	15	66	64	73	61	49	54	39	54	88	89	CoLo events
0.595238	12.8834	14.7253	11.7778	5.74713	15.0685	22.8571	17.8049	17.3295	14.1618	10.7784	5.35714	18.2432	20.7547	36.0324	%
137	409	430	155	286	239	178	355	277	258	173	244	281	254	367	AR count
2	21	67	53	15	66	64	73	61	49	54	39	54	88	89	CoLo events
1.45985	5.13447	15.5814	34.1935	5.24476	27.6151	35.9551	20.5634	22.0217	18.9922	31.2139	15.9836	19.2171	34.6457	24.2507	%
0.0259941	0.0304599	0.0334685	0.0388953	0.040769	0.0307151	0.0355006	0.0375557	0.0395511	0.0318517	0.0254556	0.0237188	0.0479367	0.0211592	0.0230982	average volume DAAM2 droplets > 0.0185

## Sheet: GSF control DHT
1	2	3	4	5	6	7	8	9	10	11	12	13	14	15	cell count
482	570	469	569	838	438	534	426	310	629	580	937	640	389	768	DAAM2 count
140	247	175	137	149	224	142	206	139	140	185	142	119	167	92	CoLo events
29.0456	43.3333	37.3134	24.0773	17.7804	51.1416	26.5918	48.3568	44.8387	22.2576	31.8966	15.1547	18.5938	42.9306	11.9792	%
1188	1169	1107	1279	975	979	1599	718	1031	985	1364	1214	1594	1064	958	AR count
140	247	175	137	149	224	142	206	139	140	185	142	119	167	92	CoLo events
11.7845	21.1292	15.8085	10.7115	15.2821	22.8805	8.88055	28.6908	13.4821	14.2132	13.563	11.6969	7.4655	15.6955	9.60334	%
0.0491219	0.0549473	0.0457142	0.0458123	0.0419786	0.0434494	0.0343584	0.0367215	0.0339462	0.0358803	0.0486047	0.0374891	0.0398223	0.0473377	0.0529631	average volume DAAM2 droplets > 0.0185

## Sheet: GSF control DHT + Hex
1	2	3	4	5	6	7	8	9	10	11	12	13	14	15	cell count
164	178	205	233	406	450	381	425	289	219	189	86	160	111	284	DAAM2 count
22	34	35	44	63	38	28	30	43	60	26	41	46	35	50	CoLo events
13.4146	19.1011	17.0732	18.8841	15.5172	8.44444	7.34908	7.05882	14.8789	27.3973	13.7566	47.6744	28.75	31.5315	17.6056	%
516	389	204	426	580	393	505	599	582	422	490	544	354	600	642	AR count
22	34	35	44	63	38	28	30	43	60	26	41	46	35	50	CoLo events
4.26357	8.74036	17.1569	10.3286	10.8621	9.66921	5.54455	5.00835	7.38832	14.218	5.30612	7.53676	12.9944	5.83333	7.78816	%
0.0245395	0.0236822	0.0270398	0.0216888	0.0249343	0.0208519	0.0213583	0.0232394	0.0211888	0.0306168	0.026338	0.0356695	0.0349305	0.0368184	0.0295212	average volume DAAM2 droplets > 0.0185

## Sheet: GSF control DHT + Swin
1	2	3	4	5	6	7	8	9	10	11	12	13	14	15	cell count
298	371	388	299	368	365	278	345	414	286	453	350	396	577	477	DAAM2 count
69	57	78	35	87	78	71	68	86	63	51	79	40	93	51	CoLo events
23.1544	15.3639	20.1031	11.7057	23.6413	21.3699	25.5396	19.7101	20.7729	22.028	11.2583	22.5714	10.101	16.1179	10.6918	%
1180	898	1346	1078	803	1058	921	688	845	1020	811	940	739	683	741	AR count
69	57	78	35	87	78	71	68	86	63	51	79	40	93	51	CoLo events
5.84746	6.34744	5.79495	3.24675	10.8344	7.3724	7.70901	9.88372	10.1775	6.17647	6.28853	8.40426	5.41272	13.6164	6.88259	%
0.0275971	0.0266613	0.0363918	0.0295652	0.0265149	0.0390221	0.0321326	0.0445979	0.0379024	0.0469826	0.0385294	0.0281183	0.0243883	0.0250689	0.0251946	average volume DAAM2 droplets > 0.0185

## Sheet: GSF control DHT + LatB
1	2	3	4	5	6	7	8	9	10	11	12	13	14	15	cell count
288	283	299	402	399	502	411	413	470	285	558	240	471	378	311	DAAM2 count
87	97	56	4	25	32	12	23	44	19	13	42	52	17	35	CoLo events
30.2083	34.2756	18.7291	0.995025	6.26566	6.3745	2.91971	5.56901	9.3617	6.66667	2.32975	17.5	11.0403	4.49735	11.254	%
880	491	802	955	500	836	539	524	462	998	787	1040	725	925	1034	AR count
87	97	56	4	25	32	12	23	44	19	13	42	52	17	35	CoLo events
9.88636	19.7556	6.98254	0.418848	5	3.82775	2.22635	4.38931	9.52381	1.90381	1.65184	4.03846	7.17241	1.83784	3.38491	%
0.0243957	0.0231067	0.02864	0.028735	0.0277053	0.0287708	0.0235692	0.0273445	0.0266848	0.030221	0.0220764	0.0238887	0.0232928	0.0219502	0.0222956	average volume DAAM2 droplets > 0.0185

## Sheet: droplets vs beads
beads	droplets
0.00246	0.0259
0.00574	0.0046
0.0127	0.00706
0.0215	0.0226
0.00482	0.0329
0.0011	0.0133
0.0018	0.0239
0.00815	0.0176
0.00469	0.0431
0.0072	0.014
0.00483	0.0317
0.0112	0.0334
0.0112	0.025
0.0042	0.0115
0.00145	0.0112
