# Supplementary material for: Formin-mediated nuclear actin assembly at androgen receptors promotes transcriptional droplet formation
Source: Research Square preprint supplement (doi:10.21203/rs.3.rs-1664650/v1), 2023-01-31
Supplement: Supplementary file 3 [file 822e9dce503aa94b7bce003e.xlsx]

## Sheet: GSF EtOH
cell count	total events CoLo DAAM2 + Pol II + AR	Sum of CoLo volume (surface tool)
1	28	0.5177
2	70	0.3947
3	66	0.3349
4	22	0.2285
5	66	0.5503
6	47	0.4524
7	41	0.4997
8	17	0.04
9	62	0.2389
10	9	0.0434
11	51	0.2244
12	51	0.0922
13	24	0.1249
14	14	0.1216
15	50	0.2254
16	42	0.2624
17	54	0.231
18	26	0.1926
19	21	0.1463
20	43	0.2187
21	37	0.2051
22	40	0.3229
23	20	0.1051
24	55	0.5133
25	42	0.2217

## Sheet: GSF DHT 6h
cell count	total events CoLo DAAM2 + Pol II + AR	Sum of CoLo volume (surface tool)
1	22	0.1241
2	60	0.3643
3	55	0.1624
4	109	0.4446
5	84	0.2087
6	130	0.3675
7	131	0.9429
8	58	0.5303
9	37	0.2133
10	43	0.1831
11	114	0.6025
12	81	0.3256
13	106	0.8302
14	73	0.2416
15	88	0.7763
16	18	0.1328
17	85	0.6308
18	136	1.0043
19	114	0.4301
20	20	0.0524
21	92	0.2896
22	76	0.2376
23	19	0.0663
24	66	0.343
25	39	0.2218

## Sheet: GSF DHT 24h
cell count	total events CoLo DAAM2 + Pol II + AR	Sum of CoLo volume (surface tool)
1	163	0.878
2	196	1.0564
3	164	1.0124
4	182	0.9811
5	202	1.2963
6	141	0.6525
7	150	1.6719
8	124	1.1725
9	109	0.8774
10	70	0.6186
11	171	1.5206
12	128	1.6896
13	178	1.1082
14	184	0.9319
15	201	0.9568
16	169	1.0052
17	115	0.5581
18	229	1.4676
19	145	0.8404
20	107	0.6099
21	129	1.3245
22	53	0.4682
23	83	0.9084
24	122	1.0012
25	190	1.0418

## Sheet: GSF DHT + Hex
cell count	total events CoLo DAAM2 + Pol II + AR	Sum of CoLo volume (surface tool)
1	26	0.109
2	32	0.0869
3	3	0.0108
4	12	0.04
5	9	0.0513
6	1	0.0003
7	5	0.0145
8	31	0.0954
9	18	0.0359
10	22	0.0845
11	21	0.0536
12	53	0.1888
13	9	0.0267
14	38	0.1173
15	4	0.0046
16	17	0.1906
17	14	0.1828
18	39	0.1258
19	22	0.0998
20	14	0.0671
21	15	0.0558
22	14	0.0316
23	39	0.2175
24	20	0.0791
25	35	0.1784

## Sheet: GSF DHT + Swin
cell count	total events CoLo DAAM2 + Pol II + AR	Sum of CoLo volume (surface tool)
1	19	0.0506
2	13	0.0239
3	19	0.0759
4	15	0.0933
5	7	0.0986
6	39	0.157
7	25	0.0734
8	42	0.0899
9	33	0.0684
10	35	0.0923
11	23	0.068
12	29	0.071
13	23	0.0853
14	18	0.1055
15	32	0.0843
16	24	0.1064
17	38	0.1211
18	53	0.2626
19	51	0.144
20	29	0.0812
21	20	0.0973
22	52	0.2427
23	52	0.4371
24	64	0.4085
25	39	0.1496
