# Supplementary material for: Formin-mediated nuclear actin assembly at androgen receptors promotes transcriptional droplet formation
Source: Research Square preprint supplement (doi:10.21203/rs.3.rs-1664650/v1), 2023-01-31
Supplement: Supplementary file 4 [file 8b0ae353461509fcf7812962.xlsx]

## Sheet: Tabelle1
cell si ctrl	AR droplets	number actin spots in 100 nm proximity to AR center	%		cell si DAAM2	AR droplets	number actin spots in 100 nm proximity to AR center	%
1	254	131	51.5748		1	207	27	13.0435
2	488	232	47.541		2	509	52	10.2161
3	975	578	59.2821		3	744	27	3.62903
4	572	314	54.8951		4	340	20	5.88235
5	409	165	40.3423		5	419	29	6.92124
6	362	135	37.2928		6	935	55	5.88235
7	365	149	40.8219		7	280	43	15.3571
8	406	168	41.3793		8	493	41	8.31643
9	396	154	38.8889		9	561	89	15.8645
10	536	139	25.9328		10	825	52	6.30303
11	333	153	45.9459		11	661	56	8.47201
12	609	196	32.1839		12	400	50	12.5
13	403	65	16.129		13	636	56	8.80503
14	185	47	25.4054		14	356	51	14.3258
15	670	200	29.8507		15	874	71	8.12357
16	483	151	31.2629		16	1331	94	7.06236
17	638	149	23.3542		17	503	66	13.1213
18	321	84	26.1682		18	494	100	20.2429
19	193	48	24.8705		19	762	79	10.3675
20	525	189	36		20	571	84	14.711
