# Supplementary material for: Formin-mediated nuclear actin assembly at androgen receptors promotes transcriptional droplet formation
Source: Research Square preprint supplement (doi:10.21203/rs.3.rs-1664650/v1), 2023-01-31
Supplement: Supplementary file 5 [file a2da938963c24caa774b8298.xlsx]

## Sheet: PSA-Luc reporter NLS R62D
ctrl	DHT	R62D NLS	R62D NLS	myc NLS-BFP
10	323	45	21	239	PSA-Luc
172	168	126	180	116	Renilla
0.0581395	1.92262	0.357143	0.116667	2.06034	PSA/Renilla
1	33.069	6.14286	2.00667	35.4379	normalized to ctrl
3	105	31	24	242	PSA-Luc
52	58	54	84	115	Renilla
0.0576923	1.81034	0.574074	0.285714	2.10435	PSA/Renilla
1	31.3793	9.95062	4.95238	36.4754	normalized to ctrl
11	229	150	21	215	PSA-Luc
65	49	57	55	44	Renilla
0.169231	4.67347	2.63158	0.381818	4.88636	PSA/Renilla
1	27.616	15.5502	2.2562	28.874	normalized to ctrl

## Sheet: PSA-Luc reporter NLS-Arpin, NLS
EtOH	DHT	NLS-Arpin	dn NLS Arp2	EXP6
10	323	245	242	105	PSA-Luc
172	168	141	125	142	Renilla
0.0581395	1.92262	1.73759	1.936	0.739437	PSA/Renilla
1	33.069	29.8865	33.2992	12.7183	normalized to ctrl
3	138	142	136	81	PSA-Luc
55	60	62	66	61	Renilla
0.0545455	2.3	2.29032	2.06061	1.32787	PSA/Renilla
1	42.1667	41.9892	37.7778	24.3443	normalized to ctrl
16	321	329	339	125	PSA-Luc
212	137	147	139	120	Renilla
0.0754717	2.34307	2.2381	2.43885	1.04167	PSA/Renilla
1	31.0456	29.6548	32.3147	13.8021	normalized to ctrl

## Sheet: PSA-Luc reporter siRNA
ctrl	DHT	si DAAM2	wt rescue	D165E rescue	N614 rescue	si Dia 3
29	505	265	298	93	161	568	PSA-Luc
86	106	117	91	92	89	145	Renilla
0.337209	4.76415	2.26496	3.27473	1.01087	1.80899	3.91724	PSA/Renilla
1	14.1282	6.71677	9.71125	2.99775	5.36459	11.6166	normalized to ctrl
28	397	212	277	187	235	488	PSA-Luc
92	103	127	92	122	121	143	Renilla
0.304348	3.85437	1.66929	3.01087	1.53279	1.94215	3.41259	PSA/Renilla
1	12.6644	5.48481	9.89286	5.0363	6.38135	11.2128	normalized to ctrl
13	184	48	111	53	92	178	PSA-Luc
41	44	47	52	41	43	52	Renilla
0.317073	4.18182	1.02128	2.13462	1.29268	2.13953	3.42308	PSA/Renilla
1	13.1888	3.22095	6.73225	4.07692	6.74776	10.7959	normalized to ctrl
