# Supplementary material for: Formin-mediated nuclear actin assembly at androgen receptors promotes transcriptional droplet formation
Source: Research Square preprint supplement (doi:10.21203/rs.3.rs-1664650/v1), 2023-01-31
Supplement: Supplementary file 6 [file de16f69ed6a3ee3866b3dae9.xlsx]

## Sheet: Tabelle1
Well	Fluor	Target	Content	Sample	Biological Set Name	Cq	Cq Mean	Cq Std. Dev
A01	SYBR		Unkn-01	EtOH	GAPDH	17.661	17.5611	0.141255
A02	SYBR		Unkn-01	EtOH	GAPDH	17.4612	17.5611	0.141255
A03	SYBR		Unkn-02	DHT	GAPDH	18.2794	18.0941	0.262032
A04	SYBR		Unkn-02	DHT	GAPDH	17.9088	18.0941	0.262032			PSA I	Delta CT	2^-DeltaCT	ddCT	2^-ddCT
A05	SYBR		Unkn-03	Hex	GAPDH	20.4488	20.8232	0.529391			EtOH	13.7868	7.07548e-05	0	1
A06	SYBR		Unkn-03	Hex	GAPDH	21.1975	20.8232	0.529391			DHT	9.66797	0.00122928	-4.11884	17.3738
A07	SYBR		Unkn-04	Swin	GAPDH	20.3645	22.6378	3.21485			Hex	11.4443	0.000358868	-2.34256	5.072
A08	SYBR		Unkn-04	Swin	GAPDH	24.911	22.6378	3.21485			Swin	12.4095	0.00018381	-1.37732	2.59785
A09	SYBR		Unkn	ctrl	GAPDH	34.4207	34.4207	0
B01	SYBR		Unkn-05	EtOH	PSA	31.5497	31.3479	0.285404
B02	SYBR		Unkn-05	EtOH	PSA	31.1461	31.3479	0.285404
B03	SYBR		Unkn-06	DHT	PSA	27.9896	27.7621	0.321755
B04	SYBR		Unkn-06	DHT	PSA	27.5346	27.7621	0.321755
B05	SYBR		Unkn-07	Hex	PSA	33.4017	32.2674	0.189933
B06	SYBR		Unkn-07	Hex	PSA	32.1331	32.2674	0.189933
B07	SYBR		Unkn-08	Swin	PSA	34.9883	35.0472	0.0833579
B08	SYBR		Unkn-08	Swin	PSA	34.1062	35.0472	0.0833579
B09	SYBR		Unkn	ctrl	PSA	34.0071	34.0071	0
A01	SYBR		Unkn-01	EtOH	GAPDH	16.3182	16.2552	0.0890992
A02	SYBR		Unkn-01	EtOH	GAPDH	16.1922	16.2552	0.0890992			PSA II	Delta CT	2^-DeltaCT	ddCT	2^-ddCT
A03	SYBR		Unkn-02	EtOH	GAPDH	15.7868	15.9441	0.222465			EtOH	12.608	0.000160186	0	1
A04	SYBR		Unkn-02	EtOH	GAPDH	16.1014	15.9441	0.222465			DHT	9.18656	0.00171621	-3.42141	10.7139
A05	SYBR		Unkn-03	DHT	GAPDH	17.2074	17.2089	0.00210416			Hex	11.7053	0.000299469	-0.90266	1.86951
A06	SYBR		Unkn-03	DHT	GAPDH	17.2104	17.2089	0.00210416			Swin	11.3006	0.000396449	-1.30739	2.47494
A07	SYBR		Unkn-04	DHT	GAPDH	18.2394	18.6033	0.514543
A08	SYBR		Unkn-04	DHT	GAPDH	18.9671	18.6033	0.514543
A09	SYBR		Unkn	Hex	GAPDH	20.6302	20.2625	0
A10	SYBR		Unkn	Hex	GAPDH	19.8949	20.2625	0
A11	SYBR		Unkn	Hex	GAPDH	21.1192	22.3781	0
A12	SYBR		Unkn	Hex	GAPDH	23.637	22.8781	0			PSA III	Delta CT	2^-DeltaCT	ddCT	2^-ddCT
B01	SYBR		Unkn-05	EtOH	PSA	29.4136	28.8631	0.778439			EtOH	11.9816	0.000247272	0	1
B02	SYBR		Unkn-05	EtOH	PSA	28.3127	28.8631	0.778439			DHT	8.04476	0.00378691	-3.93685	15.3147
B03	SYBR		Unkn-06	EtOH	PSA	27.4616	27.9257	0.65633			Hex	10.0652	0.000933432	-1.91644	3.77491
B04	SYBR		Unkn-06	EtOH	PSA	28.3898	27.9257	0.65633			Swin	9.81402	0.00111093	-2.16759	4.49273
B05	SYBR		Unkn-07	DHT	PSA	26.3799	26.3955	0.0220812
B06	SYBR		Unkn-07	DHT	PSA	26.4111	26.3955	0.0220812
B07	SYBR		Unkn-08	DHT	PSA		0	0
B08	SYBR		Unkn-08	DHT	PSA	26.648	26.648	0
B09	SYBR		Unkn	Hex	PSA	32.4678	31.9678	0
B10	SYBR		Unkn	Hex	PSA	29.4804	31.9678	0
B11	SYBR		Unkn	Hex	PSA	32.1597	32.4433	0
B12	SYBR		Unkn	Hex	PSA	32.7268	30.9433	0
